# Supplementary material for: A micron-sized Co-MOF sheet to activate peroxymonosulfate for efficient organic pollutant degradation
Source: Royal Society of Chemistry journal article supplement (doi:10.1039/d2ce00791f), 2022-01-01
Supplement: d2ce00791f1.pdf [file d2ce00791f1.pdf]

## Supporting Information

# **A micron-sized Co-MOF sheet to active peroxymonosulfate for efficient organic pollutant degradation**

Fu-Xue Wang,<sup>ab</sup> Zi-Chen Zhang,<sup>ab</sup> Xiao-Hong Yi,<sup>ab</sup> Chong-Chen Wang,<sup>\*ab</sup> Peng Wang,<sup>ab</sup> Chao-Yang Wang,<sup>ab</sup> Baoyi Yu<sup>c</sup>

<sup>a</sup> Beijing Key Laboratory of Functional Materials for Building Structure and Environment Remediation, Beijing University of Civil Engineering and Architecture, Beijing 100044, PR China.

<sup>b</sup> Beijing Energy Conservation & Sustainable Urban and Rural Development Provincial and Ministry Co-construction Collaboration Innovation Center, Beijing University of Civil Engineering and Architecture, Beijing 100044, PR China.

<sup>c</sup> Key Laboratory of Urban Agriculture (North China), Ministry of Agriculture, College of Biological Sciences Engineering, Beijing University of Agriculture, Beijing 102206, China.

---

\* Corresponding author.

E-mail address: [wangchongchen@bucea.edu.cn](mailto:wangchongchen@bucea.edu.cn), [chongchenwang@126.com](mailto:chongchenwang@126.com) (C.-C. Wang)

### **Test S1. Materials and characterization**

X-ray single-crystal data collection for BUC-92, the same to our previous report,<sup>1</sup> was carried out with a Rigaku oxford diffraction XtaLAB mini II detector diffractometer with Mo  $K_{\alpha}$  radiation ( $\lambda = 0.71073 \text{ \AA}$ ) at 293(2) K. The SMART software was used for data collection and the SAINT software for data extraction. Empirical absorption correction was performed with the SADABS program. The structure was solved using Olex2 with the SIR2004 structure solution program using Direct Methods and refined with the ShelXL refinement package using Least Squares minimization.<sup>2, 3</sup> All the chemicals were of analytical grade and were used as received without further purification. Powder X-ray diffraction (PXRD) patterns were tested by a Dandonghaoyuan DX-2700B diffractometer in the range of  $2\theta = 5 - 50^{\circ}$  using Cu- $K_{\alpha}$  radiation. The scanning electron microscope (SEM) was acquired by TM3030Plus Main Unit. The Electrochemical measurements were tested by Metrohm Autolab PGSTAT204 electrochemical station with 0.2 mM  $\text{Na}_2\text{SO}_4$  solution (pH = 5.0) as the electrolyte in a typical three-electrode mode. The electron spin resonance (ESR) signals of the spin-trapped radicals were examined on a JES FA200 spectrometer using the 5,5-dimethyl-1-pyrroline N-oxide (DMPO) and 2,2,6,6-Tetramethylpiperidine (TEMP) in dark conditions. The released Co ion was detected by ICP-5000, Focused Photonics Inc., China. The concentration changes of RhB solution was tested by Laspec Alpha-1860 spectrometer at the maximum absorbance 554 nm.

### **Test S2. Synthesis of BUC-92 and BUC-67**

BUC-92 was synthesized by solvothermal method. Briefly, a mixture of  $\text{CoCl}_2 \cdot 6\text{H}_2\text{O}$  (0.3 mmol, 71.38 mg) and  $\text{H}_2\text{L}$  (0.3 mmol, 106.31 mg), 1.0 mL N, N-Dimethylformamide (DMF) and 14.0 mL deionized water were sealed in a 25 mL Teflon-lined stainless steel Parr bomb, which was heated at 170 °C for 12 h.

BUC-67 was synthesized by hydrothermal method similar with that of BUC-92, while 0.3 mmol bpy was added in and without use of DMF and the reaction condition was 160 °C for 72 h.<sup>4</sup>

### **Test S3. RhB degradation over BUC-92 and BUC-67**

10 mg catalyst was added into 50.0 mL aqueous solution containing RhB ( $10 \text{ mg L}^{-1}$ ), in which 40  $\mu\text{L}$  PMS (250 mM) was added. At given time intervals, 1.2 mL solution was drawn for determination.

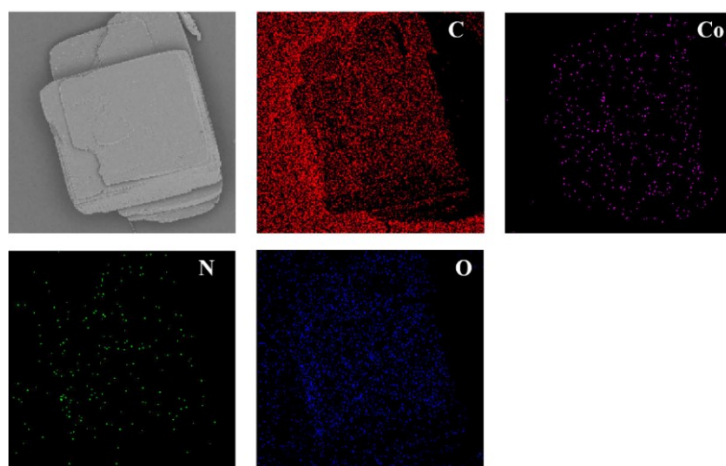

Fig. S1 EDS mapping of BUC-92 sheet

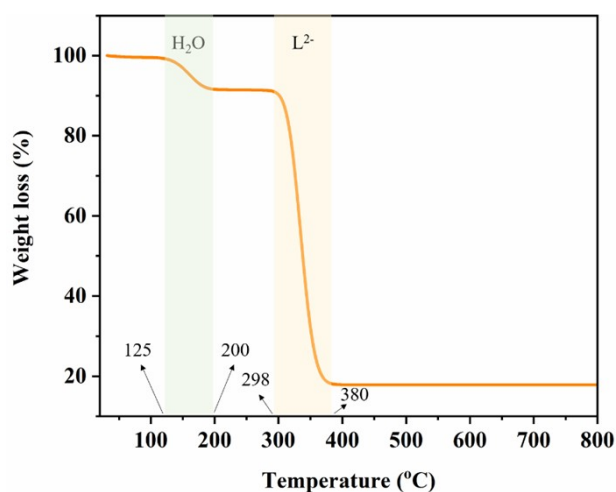

Fig. S2 TGA of BUC-92

Table S1 Selected bond lengths and angles of BUC-92

| Bond lengths (Å) |             |             |             |
|------------------|-------------|-------------|-------------|
| Co1—O1           | 2.042 (3)   | Co1—O2W     | 2.117 (4)   |
| Co1—O1W          | 2.081 (3)   | Co1—O4      | 2.061 (3)   |
| Co1—O2           | 2.110 (3)   | Co1—N1      | 2.317 (3)   |
| Bond angles (°)  |             |             |             |
| O1—Co1—O1W       | 90.22 (12)  | O1W—Co1—O2W | 90.02 (18)  |
| O1—Co1—O2        | 88.49 (12)  | O1W—Co1—N1  | 90.63 (12)  |
| O1—Co1—O2W       | 88.31 (18)  | O2—Co1—O2W  | 89.24 (18)  |
| O1—Co1—O4        | 171.92 (12) | O2—Co1—N1   | 90.25 (11)  |
| O1—Co1—N1        | 97.99 (12)  | O2W—Co1—N1  | 173.67 (17) |
| O1W—Co1—O2       | 178.53 (13) | O4—Co1—O1W  | 95.02 (13)  |
| O4—Co1—O2        | 86.34 (13)  | O4—Co1—O2W  | 97.81 (18)  |
| O4—Co1—N1        | 75.86 (13)  |             |             |

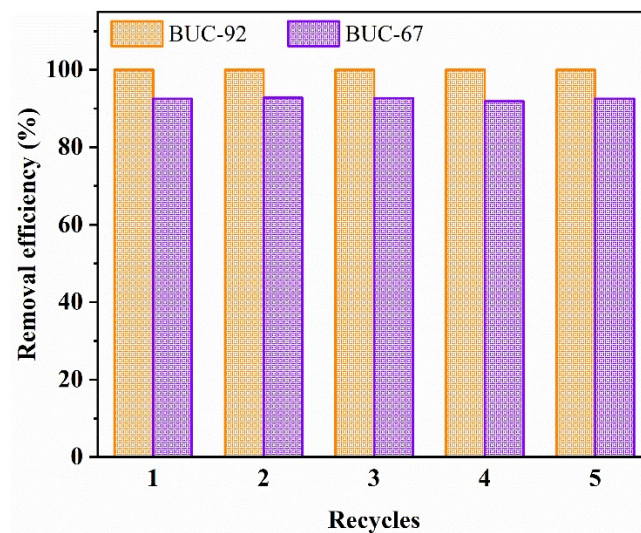

Fig. S3 Cyclic experiments of RhB degradation over BUC-92 and BUC-67 via PMS activation.

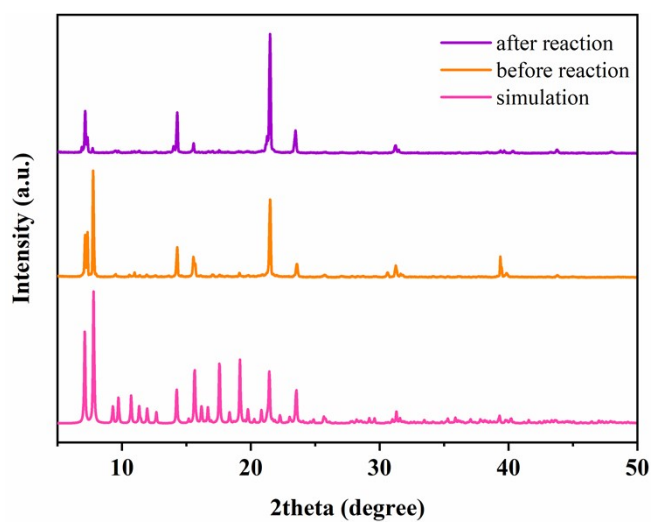

Fig. S4 XRD patterns of BUC-67.

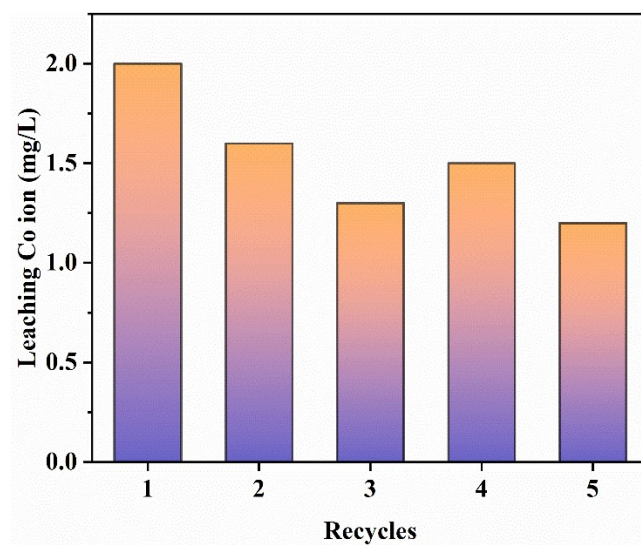

Fig. S5 Concentration of the leaching Co ion from BUC-92 at different recycles.

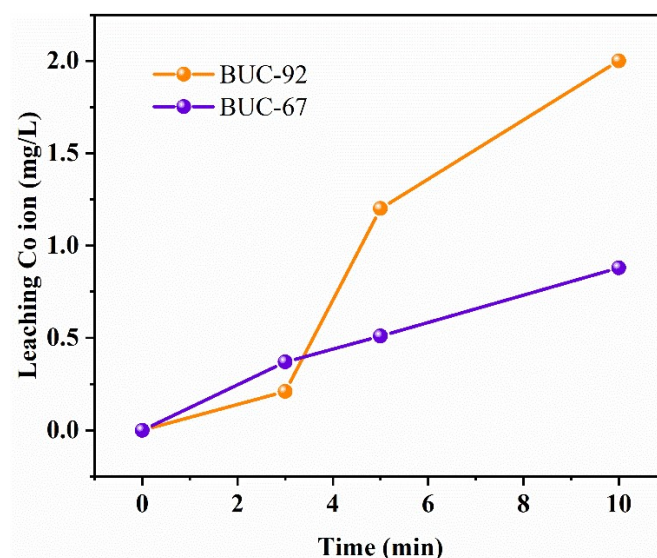

Fig. S6 Concentration of the leaching Co ion with time. Reaction conditions: 10 mg catalyst, 0.2 mM PMS, 50 mL 10 mg/L RhB, initial pH, in dark.

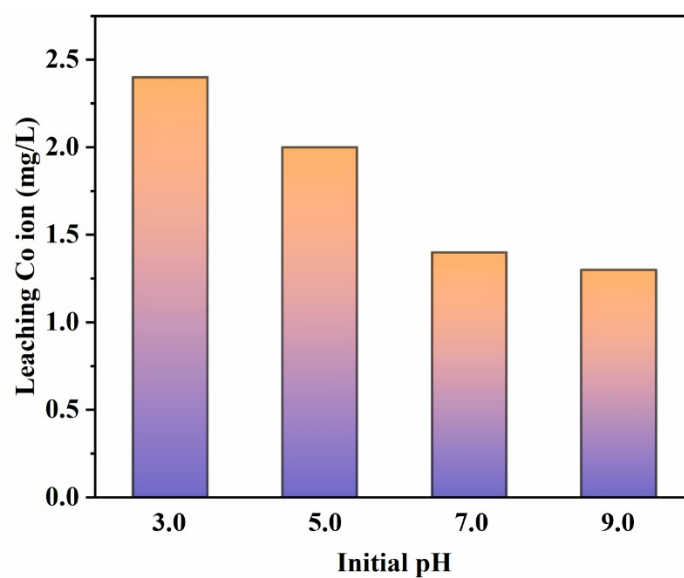

Fig. S7 Concentration of the leaching Co ion from BUC-92 under different pH values. Reaction conditions: 10 mg catalyst, 0.2 mM PMS, 50 mL 10 mg/L RhB, in dark.

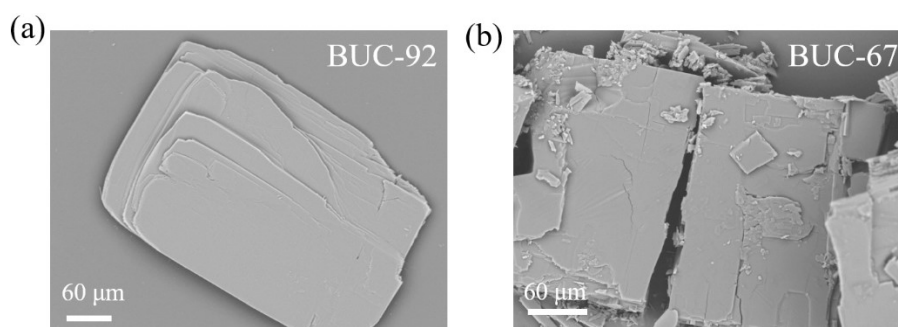

Fig. S8 SEM images of (a) BUC-92, (b) BUC-67 after reaction.

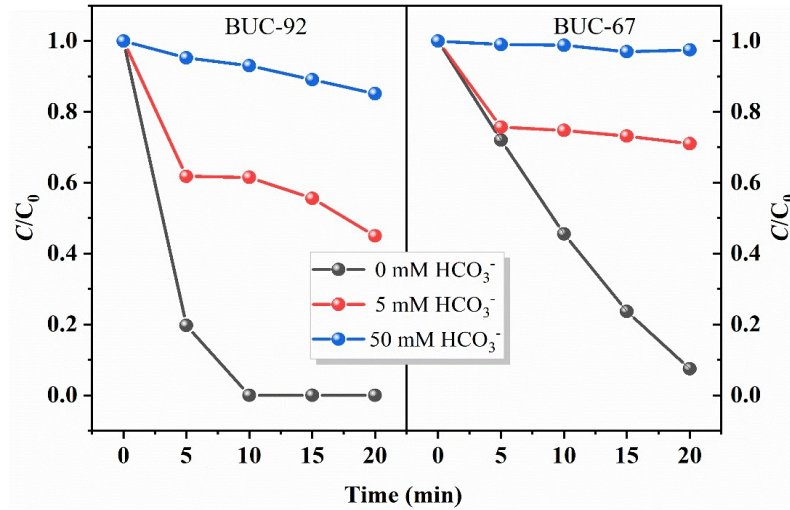

Fig. S9 Influences of  $\text{HCO}_3^-$  on RhB degradation over BUC-92 and BUC-67 via PMS activation. Reaction conditions: 10 mg catalyst, 0.2 mM PMS, 50 mL 10 mg/L RhB, in dark.

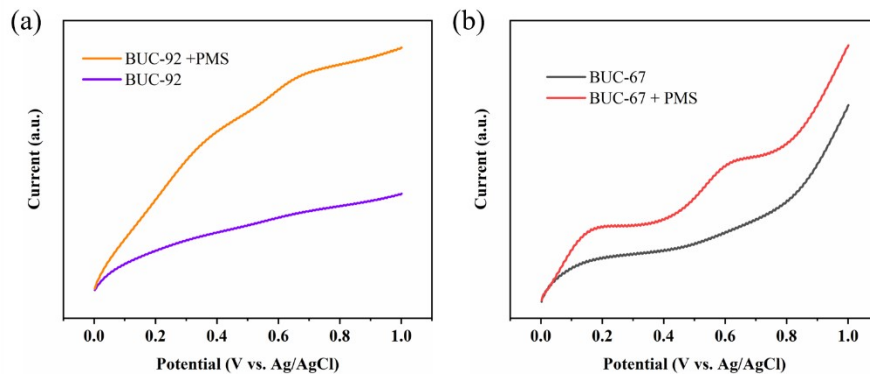

Fig. S10 Linear sweep voltammetry (LSV) curves of (a) BUC-92 and (b) BUC-67 with/without PMS

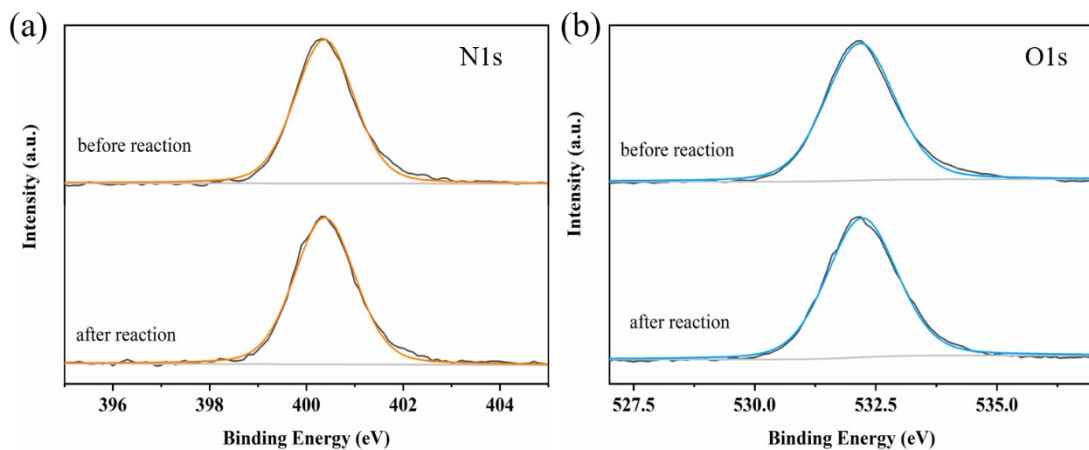

Fig. S11 XPS spectra of (a) N1s and (b) O1s in BUC-92 before and after reaction.

Table S2 Comparison of PMS activation activities toward RhB over different Co-based catalysts

| catalyst                             | Dosage (mg/L) | RhB C <sub>0</sub> (mg/L) | PMS (mM) | Time (min) | Removal (%) | Ref.      |
|--------------------------------------|---------------|---------------------------|----------|------------|-------------|-----------|
| S-Co-MOF                             | 20            | 9.6                       | 0.2      | 10         | 100         | 5         |
| Zn/Co-ZIF                            | 150           | 50                        | 0.4      | 10         | 100         | 6         |
| HAnW@CoMOF                           | 600           | 15                        | 1.8      | 0.5        | 100         | 7         |
| NbCo-MOF                             | 200           | 20                        | 0.5      | 10         | 100         | 8         |
| Co <sub>3</sub> O <sub>4</sub> -NCNF | 140           | 20                        | 0.8      | 3          | 100         | 9         |
| BUC-92                               | 200           | 10                        | 0.2      | 10         | 100         | This work |

Note: HAnW = hydroxyapatite nanowires; NCNF = N-doped carbon nanosheet frameworks.

## References

1. F.-X. Wang, C.-C. Wang, X. Du, Y. Li, F. Wang and P. Wang, *Chem. Eng. J.*, 2022, **429**, 132495.
2. O. V. Dolomanov, L. J. Bourhis, R. J. Gildea, J. A. K. Howard and H. Puschmann, *J. Appl. Crystallogr.*, 2009, **42**, 339-341.
3. M. C. Burla, R. Caliendo, M. Camalli, B. Carrozzini, G. L. Cascarano, L. De Caro, C. Giacovazzo, G. Polidori, D. Siliqi and R. Spagna, *J. Appl. Crystallogr.*, 2007, **40**, 609-613.
4. X.-H. Yi, F.-X. Wang, X.-D. Du, H. Fu and C.-C. Wang, *Polyhedron*, 2018, **152**, 216-224.
5. J. Li, W. Zhu, Y. Gao, P. Lin, J. Liu, J. Zhang and T. Huang, *Sep. Purif. Technol.*, 2022, **285**, 120362.
6. Y. Lei, W. Sun, S. K. Tiwari, K. Thummavichai, O. Ola, X. Qin, Z. Ma, N. Wang and Y. Zhu, *Journal of Environmental Chemical Engineering*, 2021, **9**, 106885.
7. B. Li, Y. Li, J. Ren, F. Dai, Y. Zhang, Y. He, P. Song and R. Wang, *ACS Applied Nano Materials*, 2021, **4**, 9370-9381.
8. Z. Li, S. Ning, H. Zhu, X. Wang, X. Yin, T. Fujita and Y. Wei, *Chemosphere*, 2022, **288**, 132600.
9. G. Yi, M. Ye, J. Wu, Y. Wang, Y. Long and G. Fan, *Appl. Surf. Sci.*, 2022, **593**, 153244.
